# Supplementary material
Source: publisher figshare collection journal article supplement (https://acs.figshare.com/ndownloader/files/5985141)
Supplement: Supplementary file 1 [file 5985141]

Compound	SMILES	EAAT1 IC50 (µM)	EAAT2 IC50 (µM)	EAAT3 IC50 (µM)
1	N[C@@H](C(N1N=NC(C2=CC=CC=C2)=C1)C(O)=O)C(O)=O	>1000 [<3.0]	~500 [~3.3]	>1000 [<3.0]
2	N[C@@H](C(NC(C1=CC=CC=C1)=O)C(O)=O)C(O)=O	~300 [~3.5]	~70 [~4.1]	~1000 [~3.0]
3-A	N[C@@H](C(NC(OC1=CC=CC=C1)=O)C(O)=O)C(O)=O	~1000 [~3.0]	>1000 [<3.0]	~300 [~3.5]
3-B	N[C@@H](C(NC(OC1=CC=CC=C1)=O)C(O)=O)C(O)=O	~70 [~4.1]	~300 [~3.5]	~300 [~3.5]
4a	N[C@@H](C(NS(=O)(C1=CC=CC=C1)=O)C(O)=O)C(O)=O	2.0 [5.71±0.11]	6.8 [5.17±0.06]	6.2 [5.20±0.09]
4a-A	N[C@H](C(O)=O)[C@H](C(O)=O)NS(=O)(C1=CC=CC=C1)=O	~200 [~3.7]	~300 [~3.5]	~300 [~3.5]
4a-B	N[C@H](C(O)=O)[C@@H](C(O)=O)NS(=O)(C1=CC=CC=C1)=O	0.80 [6.10±0.12]	2.4 [5.62±0.15]	1.2 [5.92±0.14]
4b	N[C@H](C(O)=O)C(C(O)=O)NS(C1=C(C=CC=C2)C2=CC=C1)(=O)=O	65 [4.19±0.04]	14 [4.87±0.09]	63 [4.20±0.05]
4c	N[C@H](C(O)=O)C(C(O)=O)NS(C1=CC(C=CC=C2)=C2C=C1)(=O)=O	8.8 [5.05±0.07]	6.5 [5.19±0.09]	34 [4.47±0.08]
4d-A	N[C@H](C(O)=O)C(C(O)=O)NS(C1=C(F)C(F)=C(F)C(F)=C1F)(=O)=O	>300 [<3.5]	>300 [<3.5]	>300 [<3.5]
4d-B	N[C@H](C(O)=O)C(C(O)=O)NS(C1=C(F)C(F)=C(F)C(F)=C1F)(=O)=O	16 [4.79±0.19]	~100 [~4.0]	~150 [~3.8]
4e	N[C@H](C(O)=O)C(C(O)=O)NS(C1=CC=C(F)C=C1)(=O)=O	1.6 [5.79±0.17]	4.7 [5.33±0.06]	2.0 [5.69±0.04]
4f	N[C@H](C(O)=O)C(C(O)=O)NS(C1=CC=C(Cl)C=C1)(=O)=O	0.32 [6.50±0.20]	3.1 [5.52±0.13]	1.0 [6.01±0.06]
4g	N[C@H](C(O)=O)C(C(O)=O)NS(C1=CC=C(Br)C=C1)(=O)=O	0.35 [6.44±0.06]	5.0 [5.31±0.04]	2.6 [5.59±0.03]
4h	N[C@H](C(O)=O)C(C(O)=O)NS(C1=CC=C(C)C=C1)(=O)=O	0.38 [6.42±0.05]	3.3 [5.49±0.03]	1.9 [5.71±0.04]
4i	N[C@H](C(O)=O)C(C(O)=O)NS(=O)(C1=CC=C(C(C)(C)C)C=C1)=O	~300 [~3.5]	~50 [~4.3]	~300 [~3.5]
4j	N[C@H](C(O)=O)C(C(O)=O)NS(=O)(C1=CC=C(S(=O)(C)=O)C=C1)=O	~300 [~3.5]	~300 [~3.5]	~300 [~3.5]
4k	N[C@H](C(O)=O)C(C(O)=O)NS(=O)(C1=CC=C(OC)C=C1)=O	4.0 [5.39±0.06]	~30 [~4.5]	~30 [~4.5]
4l	N[C@H](C(O)=O)C(C(O)=O)NS(=O)(C1=CC=C(C(F)(F)F)C=C1)=O	~30 [~4.5]	~50 [~4.3]	~100 [~4.0]
4m	N[C@H](C(O)=O)C(C(O)=O)NS(=O)(C1=CC=C([N+]([O-])=O)C=C1)=O	13 [4.89±0.04]	~50 [~4.3]	~100 [~4.0]
4n	N[C@H](C(O)=O)C(C(O)=O)NS(=O)(C1=CC=C(N)C=C1)=O	2.3 [5.63±0.21]	4.7 [5.33±0.04]	3.0 [5.53±0.13]
4o	N[C@H](C(O)=O)C(C(O)=O)NS(=O)(C1=CC=C(C(C)=O)C=C1)=O	44 [4.36±0.10]	43 [4.37±0.05]	~100 [~4.0]
4p	N[C@H](C(O)=O)C(C(O)=O)NS(=O)(C1=CC=C(C2=CC=CC=C2)C=C1)=O	2.3 [5.65±0.04]	0.50 [6.30±0.02]	20 [4.69±0.07]
4q	N[C@@H](C(NS(C1=CC(Cl)=CC=C1)(=O)=O)C(O)=O)C(O)=O	3.8 [5.42±0.05]	2.7 [5.57±0.15]	12 [4.92±0.07]
4r	N[C@H](C(O)=O)C(C(O)=O)NS(C1=CC(C(F)(F)F)=CC=C1)(=O)=O	~100 [~4.0]	2.8 [5.56±0.11]	~150 [~3.8]
4s	OC(C([C@@H](C(O)=O)N)NS(=O)(C1=CC(C(O)=O)=CC=C1)=O)=O	>300 [<3.5]	>300 [<3.5]	>300 [<3.5]
4t	N[C@@H](C(NS(C1=C(Cl)C=CC=C1)(=O)=O)C(O)=O)C(O)=O	1.7 [5.76±0.15]	3.3 [5.48±0.11]	6.5 [5.19±0.04]
4u	N[C@@H](C(NS(C1=C(C)C=CC=C1)(=O)=O)C(O)=O)C(O)=O	2.7 [5.56±0.15]	6.6 [5.18±0.06]	8.8 [5.06±0.11]
4v	N[C@H](C(O)=O)C(C(O)=O)NS(C1=CC(C)=CC(C)=C1)(=O)=O	63 [4.20±0.10]	11 [4.97±0.12]	~100 [~4.0]
4x	N[C@H](C(O)=O)C(C(O)=O)NS(=O)(C1=C(Cl)C=CC=C1Cl)=O	~100 [~4.0]	~50 [~4.3]	~300 [~3.5]
4y	N[C@H](C(O)=O)C(C(O)=O)NS(=O)(C1=CC=C(F)C(F)=C1)=O	0.80 [6.10±0.06]	11 [5.96±0.04]	7.4 [5.13±0.05]
4z	N[C@H](C(O)=O)C(C(O)=O)NS(=O)(C1=C(F)C=C(F)C(F)=C1)=O	2.5 [5.60±0.15]	22 [4.65±0.08]	10 [4.98±0.11]
4aa	N[C@H](C(O)=O)C(C(O)=O)NS(=O)(CC1=CC=CC=C1)=O	49 [4.31±0.01]	60 [4.22±0.03]	76 [4.12±0.09]
4ab	N[C@H](C(O)=O)C(C(O)=O)NS(=O)(C1=CC=CN=C1)=O	18 [4.74±0.08]	28 [4.60±0.04]	13 [4.12±0.09]
4ac	N[C@H](C(O)=O)C(C(O)=O)NS(=O)(C1=CC=CS1)=O	9.4 [5.03±0.13]	7.3 [5.14±0.02]	3.1 [5.51±0.10]
4ad	N[C@H](C(O)=O)C(C(O)=O)N(C)S(=O)(C1=CC=CC=C1)=O	>300 [<3.5]	>300 [<3.5]	>300 [<3.5]
